# Supplementary material for: The longest homogeneous series of grape harvest dates, Beaune 1354–2018, and its significance for the understanding of past and present climate
Source: Copernicus journal article supplement (doi:10.5194/cp-15-1485-2019), 2019-08-29
Supplement: Supplementary file 1 [file cp-15-1485-2019-supplement.zip]

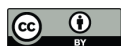

## *Supplement of*

# **The longest homogeneous series of grape harvest dates, Beaune 1354–2018, and its significance for the understanding of past and present climate**

**Thomas Labbé et al.**

*Correspondence to:* Thomas Labbé ([thomas.labbe@u-bourgogne.fr](mailto:thomas.labbe@u-bourgogne.fr))

- [cp-15-1485-2019-supplement-title-page.pdf](#)
- [Supplement\\_dataset\\_Labbe\\_et\\_al\\_2019.txt](#)
- [Supplementary\\_figures\\_Labbe\\_et\\_al\\_2019.docx](#)

The copyright of individual parts of the supplement might differ from the CC BY 4.0 License.
